# Supplementary material
Source: PubMed Central journal article supplement (PMC6026551)
Supplement: NIHMS973704-supplement-supplement_1.pdf [file NIHMS973704-supplement-supplement_1.pdf]

**Supplemental Table 1:** Detailed definitions and technical information for sociodemographics, health behaviors, and chronic medical conditions.

| Characteristic                    | Definition and/or Technical Information                                                                                                                                                                                                                                                                                               |
|-----------------------------------|---------------------------------------------------------------------------------------------------------------------------------------------------------------------------------------------------------------------------------------------------------------------------------------------------------------------------------------|
| <b>Sociodemographics</b>          |                                                                                                                                                                                                                                                                                                                                       |
| Age                               | Age in years                                                                                                                                                                                                                                                                                                                          |
| Gender                            | Male, female                                                                                                                                                                                                                                                                                                                          |
| Race                              | Black, white                                                                                                                                                                                                                                                                                                                          |
| Education                         | Participant reported: <ul style="list-style-type: none"> <li>- Less than high school</li> <li>- High school graduate</li> <li>- Some college</li> <li>- College or higher</li> <li>- Missing</li> </ul>                                                                                                                               |
| Income                            | Participant reported: <ul style="list-style-type: none"> <li>- &lt;\$20k</li> <li>- \$20k-\$34k</li> <li>- \$35k-\$74k</li> <li>- ≥\$75k</li> <li>- Missing (not reported)</li> </ul>                                                                                                                                                 |
| Geographic Region                 | Participant residence: <ul style="list-style-type: none"> <li>- Stroke Buckle (coastal plains of North Carolina, South Carolina and Georgia)</li> <li>- Stroke Belt (remainder of North Carolina, South Carolina and Georgia, plus Tennessee, Mississippi, Alabama, Louisiana and Arkansas)</li> </ul> Non-Belt/Buckle (other states) |
| <b>Health Behaviors</b>           |                                                                                                                                                                                                                                                                                                                                       |
| Smoking Status                    | Participant reported: <ul style="list-style-type: none"> <li>- Current</li> <li>- Past</li> <li>- Never</li> </ul>                                                                                                                                                                                                                    |
| Alcohol use                       | Participant reported: <ul style="list-style-type: none"> <li>- None</li> <li>- Moderate (up to 1 drink per day for women or 2 drinks per day for men)</li> <li>- Heavy (&gt;1 drink per day for women and &gt;2 drinks per day for men).<sup>63</sup></li> </ul>                                                                      |
| <b>Chronic Medical Conditions</b> |                                                                                                                                                                                                                                                                                                                                       |
| Atrial Fibrillation               | Participant reported history of atrial fibrillation.                                                                                                                                                                                                                                                                                  |
| Chronic Lung Disease              | Participant use of pulmonary medications (beta agonists, leukotriene inhibitors, inhaled corticosteroids, combination inhalers, ipratropium, cromolyn, aminophylline and theophylline) as a surrogate for chronic lung disease.                                                                                                       |
| Coronary Artery Disease           | Participant reported history of myocardial infarction, coronary artery bypass grafting, or cardiac angioplasty or stenting, or baseline electrocardiographic evidence of                                                                                                                                                              |

|                                             |                                                                                                                                                                                                                                                                                                                        |
|---------------------------------------------|------------------------------------------------------------------------------------------------------------------------------------------------------------------------------------------------------------------------------------------------------------------------------------------------------------------------|
|                                             | myocardial infarction.                                                                                                                                                                                                                                                                                                 |
| Chronic Kidney Disease                      | Defined as measured glomerular filtration rate of <60 ml/min based upon serum creatinine.                                                                                                                                                                                                                              |
| Diabetes                                    | Fasting glucose $\geq 126$ mg/L (or a glucose $\geq 200$ mg/L for those not fasting) or participant reported use of insulin or oral hypoglycemic agents.                                                                                                                                                               |
| Deep Vein Thrombosis                        | Participant reported history of deep vein thrombosis.                                                                                                                                                                                                                                                                  |
| Dyslipidemia                                | Low-density lipoprotein cholesterol >130 mg/dL or participant reported use of lipid lowering medications.                                                                                                                                                                                                              |
| Hypertension                                | Systolic blood pressure $\geq 140$ mm Hg, diastolic blood pressure $\geq 90$ mm Hg, or participant reported antihypertensive agent use.                                                                                                                                                                                |
| Myocardial Infarction                       | Participant reported history of myocardial infarction or baseline electrocardiographic evidence of myocardial infarction.                                                                                                                                                                                              |
| Obesity                                     | {Waist circumference [ $>102$ cm for males or $>88$ cm for females]} or {body mass index $\geq 30$ kg/m <sup>2</sup> }.                                                                                                                                                                                                |
| Peripheral Artery Disease                   | Participant reported history of lower extremity arterial bypass or leg amputation.                                                                                                                                                                                                                                     |
| Stroke                                      | Participant reported history of stroke or transient ischemic attack.                                                                                                                                                                                                                                                   |
| <b>Medications</b>                          |                                                                                                                                                                                                                                                                                                                        |
| Aspirin use                                 | Self-reported participant chronic use of aspirin at baseline.                                                                                                                                                                                                                                                          |
| Statin use                                  | Self-reported participant chronic use of statins at baseline.                                                                                                                                                                                                                                                          |
| Steroid use                                 | Steroid use is the reported use of oral or injectable hydrocortisone, dexamethasone, fludrocortisone, prednisone, methyl prednisone, budesonide, and stanozolol.                                                                                                                                                       |
| Albumin-to-Creatinine Ratio (ACR)           | Abnormal defined as ACR $\geq 30$ mcg/mg. Albumin assay by nephelometry (BN ProSpec Nephelometer, Dade Behring, Siemens Healthcare, Deerfield, Illinois, USA). Urinary creatinine assay determined by rate blanked Jaffé procedure (Modular-P analyzer, Roche/Hitachi, Roche Diagnostics, Indianapolis, Indiana, USA). |
| Cystatin C                                  | Abnormal defined as Cyst-C measurements above the fourth quartile ( $\geq 1.11$ mg/dL) Assay by particle-enhanced immunonephelometry (N Latex Cyst-C, Siemens AG, Munich, Germany).                                                                                                                                    |
| High Sensitivity C-Reactive Protein (hsCRP) | Abnormal defined as hsCRP $>3.0$ mg/dL Assay by particle-enhanced immunonephelometry (N High-sensitivity CRP, Siemens AG, Munich, Germany).                                                                                                                                                                            |

**Supplemental Table 2: Mediating effects <sup>1</sup> of indicators of frailty on the association between risk of sepsis after cancer survivorship, excluding cancer deaths within 3 years. Among 27,878 REGARDS participants with 1305 first sepsis events.**

| Mediation Analysis                   |                                                            |                       |                                             |                       |                                                         |
|--------------------------------------|------------------------------------------------------------|-----------------------|---------------------------------------------|-----------------------|---------------------------------------------------------|
|                                      | Natural Indirect Effect <sup>2</sup><br>(Mediation Effect) |                       | Natural Direct Effect <sup>3</sup>          |                       | Percent Mediated <sup>4</sup> (%)<br>(Log Hazard Scale) |
|                                      | HR                                                         | 95% CI <sup>5</sup>   | HR                                          | 95% CI <sup>5</sup>   |                                                         |
| <b>Mediators</b>                     |                                                            |                       |                                             |                       |                                                         |
| Weakness                             | 1.007                                                      | 1.006 – 1.012         | 2.614                                       | 2.394 – 2.842         | 0.77%                                                   |
| Exhaustion                           | 1.005                                                      | 1.002 – 1.010         | 2.632                                       | 2.411 – 2.861         | 0.50%                                                   |
| Low Physical Activity                | 1.003                                                      | 1.000 – 1.006         | 2.622                                       | 2.398 – 2.860         | 0.26%                                                   |
| Frailty                              | 1.009                                                      | 1.005 – 1.016         | 2.607                                       | 2.389 – 2.849         | 0.92%                                                   |
| # Frailty Indicators                 | 1.008                                                      | 1.004 – 1.015         | 2.628                                       | 2.410 – 2.861         | 0.85%                                                   |
| <b>Total Effect (Risk of Sepsis)</b> |                                                            |                       |                                             |                       |                                                         |
|                                      | N                                                          | No. Sepsis Events (%) | Mean Survival Time<br>(95% CI) <sup>6</sup> | Hazard Ratio (95% CI) |                                                         |
| <b>Cancer Survivors</b>              | 25,155                                                     | 346 (12.71)           | 8.57 (8.49 – 8.65)                          | 2.62 (2.31 – 2.97)    |                                                         |
| <b>No Cancer History</b>             | 2723                                                       | 959 (3.81)            | 9.19 (9.17 – 9.20)                          | Ref                   |                                                         |

<sup>1</sup> Models adjusted for age, sex, race, and comorbidity score.

<sup>2</sup> Natural Indirect Effect (i.e., the effect of the cancer on sepsis incidence *through* the mediator)

<sup>3</sup> Natural Direct Effect (i.e., the effect of the cancer on sepsis incidence *NOT through* mediator)

<sup>4</sup> Percent Mediated = Percent of the total association between the cancer and sepsis incidence that was mediated on the log hazard scale.

<sup>5</sup> 95% Confidence intervals (CIs) estimated using 500 bootstrapped resamples.

<sup>6</sup> Mean survival time in years.

**Supplemental Table 3: Mediating effects <sup>1</sup> of indicators of frailty on the association between cancer and sepsis. Among 26158 REGARDS participants with 1224 first sepsis events. Further adjusted for biomarkers and baseline medications.**

| <b>Mediation Analysis</b>            |                                                                   |                                                    |                                          |                              |                                             |
|--------------------------------------|-------------------------------------------------------------------|----------------------------------------------------|------------------------------------------|------------------------------|---------------------------------------------|
|                                      | <b>Natural Indirect Effect<sup>2</sup><br/>(Mediation Effect)</b> |                                                    | <b>Natural Direct Effect<sup>3</sup></b> |                              | <b>Percent<br/>Mediated<sup>4</sup> (%)</b> |
|                                      | <b>HR</b>                                                         | <b>95% CI<sup>5</sup></b>                          | <b>HR</b>                                | <b>95% CI<sup>5</sup></b>    | <b>(Log Hazard Scale)</b>                   |
| <b>Mediators</b>                     |                                                                   |                                                    |                                          |                              |                                             |
| Weakness                             | 1.005                                                             | 1.002 – 1.009                                      | 2.601                                    | 2.384 – 2.879                | 0.49%                                       |
| Exhaustion                           | 1.004                                                             | 1.001 – 1.008                                      | 2.613                                    | 2.396 – 2.890                | 0.40%                                       |
| Low Physical Activity                | 1.002                                                             | 0.999 – 1.006                                      | 2.604                                    | 2.382 – 2.890                | 0.22%                                       |
| Frailty                              | 1.006                                                             | 1.002 – 1.012                                      | 2.595                                    | 2.383 – 2.883                | 0.65%                                       |
| # Frailty Indicators                 | 1.006                                                             | 1.002 – 1.011                                      | 2.595                                    | 2.383 – 2.883                | 0.60%                                       |
| <b>Total Effect (Risk of Sepsis)</b> |                                                                   |                                                    |                                          |                              |                                             |
|                                      | <b>No. Sepsis Events (%)</b>                                      | <b>Mean Survival Time<br/>(95% CI)<sup>6</sup></b> |                                          | <b>Hazard Ratio (95% CI)</b> |                                             |
| <b>Cancer Survivors</b>              | 325 (12.56)                                                       | 8.56 (8.48 – 8.64)                                 |                                          | 2.61 (2.29 – 2.97)           |                                             |
| <b>No Cancer History</b>             | 899 (3.81)                                                        | 9.19 (9.17 – 9.21)                                 |                                          | Ref                          |                                             |

<sup>1</sup> Models adjusted for age, sex, race, comorbidity score, Cystatin-C, and aspirin use.

<sup>2</sup> Natural Indirect Effect (i.e., the effect of the cancer on sepsis incidence *through* the mediator)

<sup>3</sup> Natural Direct Effect (i.e., the effect of the cancer on sepsis incidence *NOT through* mediator)

<sup>4</sup> Percent Mediated = Percent of the total association between the cancer and sepsis incidence that was mediated on the log hazard scale.

<sup>5</sup> 95% Confidence intervals (CIs) estimated using 500 bootstrapped resamples.

<sup>6</sup> Mean survival time in years.

**Supplemental Table 4: Mediating effects <sup>1</sup> of indicators of frailty on the association between cancer and sepsis. Among 10,586 Black participants with 408 first sepsis events. Further adjusted for biomarkers and baseline medications.**

| Mediators                            | Natural Indirect Effect <sup>2</sup><br>(Mediation Effect) |                     | Natural Direct Effect <sup>3</sup>          |                     | Percent Mediated <sup>4</sup> (%)<br>(Log Hazard Scale) |
|--------------------------------------|------------------------------------------------------------|---------------------|---------------------------------------------|---------------------|---------------------------------------------------------|
|                                      | HR                                                         | 95% CI <sup>5</sup> | HR                                          | 95% CI <sup>5</sup> |                                                         |
| Weakness                             | 1.001                                                      | 0.997 – 1.006       | 2.846                                       | 2.189 – 3.672       | 0.05%                                                   |
| Exhaustion                           | 1.003                                                      | 0.996 – 1.008       | 2.834                                       | 2.183 – 3.664       | 0.27%                                                   |
| Low Physical Activity                | 1.002                                                      | 0.999 – 1.005       | 2.837                                       | 2.184 – 3.641       | 0.18%                                                   |
| Frailty                              | 1.002                                                      | 1.000 – 1.005       | 2.834                                       | 2.184 – 3.641       | 0.18%                                                   |
| # Frailty Indicators                 | 1.002                                                      | 1.000 – 1.005       | 2.837                                       | 2.184 – 3.641       | 0.17%                                                   |
| <b>Total Effect (Risk of Sepsis)</b> |                                                            |                     |                                             |                     |                                                         |
|                                      | No. Sepsis Events (%) <sup>6</sup>                         |                     | Mean Survival Time<br>(95% CI) <sup>7</sup> |                     | Hazard Ratio (95% CI) <sup>8</sup>                      |
| <b>Cancer Survivors</b>              | 89 (11.51)                                                 |                     | 8.10 (7.97 – 8.24)                          |                     | 3.00 (2.36 – 3.82)                                      |
| <b>No Cancer History</b>             | 319 (3.25)                                                 |                     | 9.22 (9.19 – 9.24)                          |                     | Ref                                                     |

<sup>1</sup> Models adjusted for age, sex, race, comorbidity score, Cystatin-C, and aspirin use.

<sup>2</sup> Natural Indirect Effect (i.e., the effect of the cancer on sepsis incidence *through* the mediator)

<sup>3</sup> Natural Direct Effect (i.e., the effect of the cancer on sepsis incidence *NOT through* mediator)

<sup>4</sup> Percent Mediated = Percent of the total association between the cancer and sepsis incidence that was mediated on the log hazard scale.

<sup>5</sup> 95% Confidence intervals (CIs) estimated using 500 bootstrapped resamples.

<sup>6</sup> % represents the proportion within cancer group with sepsis event.

<sup>7</sup> Mean survival time in years.

<sup>8</sup> Estimated from Cox proportional hazards model.

**Supplemental Table 5: Mediating effects <sup>1</sup> of indicators of frailty on the association between cancer and sepsis. Among 15,572 White participants with 816 first sepsis events. Further adjusted for biomarkers and baseline medications.**

| Mediators                            | Natural Indirect Effect <sup>2</sup><br>(Mediation Effect) |                     | Natural Direct Effect <sup>3</sup>          |                     | Percent Mediated <sup>4</sup> (%)<br>(Log Hazard Scale) |
|--------------------------------------|------------------------------------------------------------|---------------------|---------------------------------------------|---------------------|---------------------------------------------------------|
|                                      | HR                                                         | 95% CI <sup>5</sup> | HR                                          | 95% CI <sup>5</sup> |                                                         |
| Weakness                             | 1.004                                                      | 1.001 – 1.012       | 2.507                                       | 2.383 – 2.761       | 0.48%                                                   |
| Exhaustion                           | 1.002                                                      | 1.000 – 1.007       | 2.513                                       | 2.392 – 2.760       | 0.26%                                                   |
| Low Physical Activity                | 1.004                                                      | 0.999 – 1.009       | 2.503                                       | 2.377 – 2.748       | 0.48%                                                   |
| Frailty                              | 1.004                                                      | 0.999 – 1.009       | 2.503                                       | 2.377 – 2.748       | 0.48%                                                   |
| # Frailty Indicators                 | 1.004                                                      | 0.999 – 1.009       | 2.514                                       | 2.389 – 2.761       | 0.48%                                                   |
| <b>Total Effect (Risk of Sepsis)</b> |                                                            |                     |                                             |                     |                                                         |
|                                      | No. Sepsis Events (%)                                      |                     | Mean Survival Time<br>(95% CI) <sup>7</sup> |                     | Hazard Ratio (95% CI) <sup>8</sup>                      |
| <b>Cancer Survivors</b>              | 236 (13.00)                                                |                     | 8.54 (8.44 – 8.64)                          |                     | 2.45 (2.10 – 2.86)                                      |
| <b>No Cancer History</b>             | 580 (4.22)                                                 |                     | 8.82 (8.80 – 8.84)                          |                     | Ref                                                     |

<sup>1</sup> Models adjusted for age, sex, race, comorbidity score, Cystatin-C, and aspirin use.

<sup>2</sup> Natural Indirect Effect (i.e., the effect of the cancer on sepsis incidence *through* the mediator)

<sup>3</sup> Natural Direct Effect (i.e., the effect of the cancer on sepsis incidence *NOT through* mediator)

<sup>4</sup> Percent Mediated = Percent of the total association between the cancer and sepsis incidence that was mediated on the log hazard scale.

<sup>5</sup> 95% Confidence intervals (CIs) estimated using 500 bootstrapped resamples.

<sup>6</sup> % represents the proportion within cancer group with sepsis event.

<sup>7</sup> Mean survival time in years.

<sup>8</sup> Estimated from Cox proportional hazards model.
